# Supplementary material for: Application of Three-Dimensional Culture Method in the Cardiac Conduction System Research
Source: MDPI journal article supplement (doi:10.3390/mps5030050), 2022-06-14
Supplement: s1 [file s1]

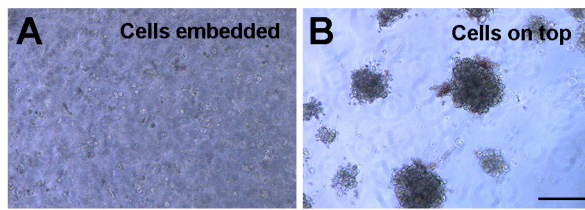

**Figure S1.** Examples of cells embedded in the matrix (**A**) and cells on the top of the matrix cultured for 5 days in Cultrex BME (**B**). Note the absence of spheroid formation in cells embedded in the matrix method. Bar = 100  $\mu$ m.

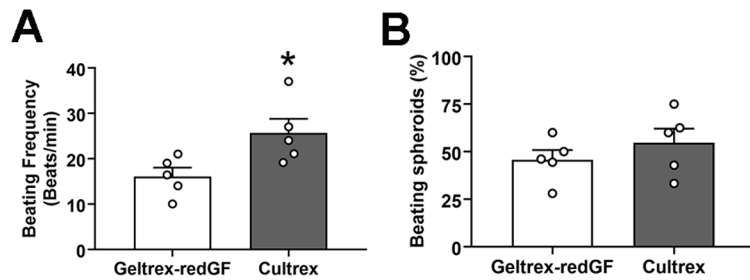

**Figure S2:** (**A**) Ventricular cells grown in Geltrex BME matrix with reduced growth factors (Geltrex-redGF) revealed significantly lower beating frequencies when compared to cells grown in regular Cultrex BME (without reduced growth factors) after day 8 in culture, (**B**) Percentage of beating spheroid cell bodies did not differ significantly between cells grown in Geltrex-redGF and Cultrex BME matrices, N = 5 independent experiments, each bar represents mean  $\pm$  SEM. \*  $p < 0.05$ , Student's unpaired  $t$ -test.
